# Supplementary material for: Transcription activity contributes to the firing of non-constitutive origins in African trypanosomes helping to maintain robustness in S-phase duration
Source: PubMed Central journal article supplement (PMC6898680; doi:10.1038/s41598-019-54366-w), 2019-12-06
Supplement: 41598_2019_54366_MOESM1_ESM.pdf [file 41598_2019_54366_MOESM1_ESM.pdf]

## Supplementary Material of

# Transcription activity contributes to the firing of non-constitutive origins in African trypanosomes helping to maintain robustness in S-phase duration

Marcelo S. da Silva, Gustavo R. Cayres-Silva, Marcela O. Vitarelli, Paula A. Marin, Priscila M. Hiraiwa, Christiane B. Araújo, Bruno B. Scholl, Andrea R. Ávila, Richard McCulloch, Marcelo S. Reis, and Maria Carolina Elias

## Contents

|          |                                                                               |           |
|----------|-------------------------------------------------------------------------------|-----------|
| <b>1</b> | <b>Correctness of Equations 3 and 4</b>                                       | <b>2</b>  |
| 1.1      | Minimum number of origins required to complete S phase . . . . .              | 2         |
| 1.2      | Lower-bound time for DNA replication with constitutive origins only . . . . . | 3         |
| <b>2</b> | <b>Supplementary Figures</b>                                                  | <b>5</b>  |
| <b>3</b> | <b>Supplementary Tables</b>                                                   | <b>11</b> |

# 1 Correctness of Equations 3 and 4

In this section, we present proofs of correctness for Equations 3 and 4 of the main paper. For both of these equations, we assume that the replication fork speed  $v$  has a negligible variance along the S-phase duration.

## 1.1 Minimum number of origins required to complete S phase

The lower-bound number of origins to replicate an entire chromosome, given as a function of chromosome size, S-phase duration and replication fork speed was presented both in Table 1 and Figure 2 of the main paper. The following theorem guarantees the correctness of that equation.

**Theorem S1.** *Let  $v$  be the replication fork average speed,  $S$  be the measured S-phase duration, and  $N$  be the chromosome size. The lower bound for the number of origins required to replicate the entire chromosome is given by:*

$$oe \geq \left\lceil \frac{N}{2vS} \right\rceil. \quad (3)$$

*Proof.* Consider two cases for Equation 3:

- $N \leq 2vS$ : in this case, we set a single origin in the middle of the chromosome. Since each fork must replicate  $\frac{N}{2}$  bases with velocity  $v$  and in at most  $S$  time, we have:

$$oe = \underbrace{1 \geq \left\lceil \frac{\frac{N}{2}}{vS} \right\rceil}_{\text{Since } N \leq 2vS} = \left\lceil \frac{N}{2vS} \right\rceil.$$

- $N > 2vS$ : In this case, we assume for this chromosome a minimal set  $\Theta$  of replication origins such that  $|\Theta| \geq 2$ . We also assume that the chromosome is divided into  $|\Theta| + 1$  pieces, and that each piece demands exactly  $S$  time to replication. These assumptions imply that the size of the first and the last pieces is  $\frac{N}{2|\Theta|}$  each, while the size of the remaining  $|\Theta| - 1$  pieces is  $\frac{N}{|\Theta|}$  each (if we slide any origin either to right or to the left, then the piece of the opposite side will demand a time greater than  $S$ , a contradiction on the given S-phase duration). Now, let us apply Equation 4, which returns a lower bound

time as a function of a set of origins, chromosome size and fork velocity:

$$\begin{aligned}
T(\Theta, \langle 1, N \rangle) &\geq \max_{1 \leq i \leq |\Theta|+1} \left\{ \frac{1}{2v} (\theta_i - \theta_{i-1}) \right\} \\
&= \frac{1}{2v} (\theta_2 - \theta_1) && \text{(Equivalent to a remaining piece)} \\
&= \frac{1}{2v} \left( \frac{N}{|\Theta|} \right) && \text{(The size of a remaining piece)} \\
&= \frac{N}{2v} \left( \frac{1}{|\Theta|} \right).
\end{aligned}$$

Observe that the last right-hand side of the equations above is equal to  $S$ , since each piece requires the same amount of time to replicate. Thus, we have:

$$\begin{aligned}
S &= \frac{N}{2v} \left( \frac{1}{|\Theta|} \right) \\
|\Theta| S &= \frac{N}{2v} \left( \frac{1}{|\Theta|} \right) |\Theta| \\
|\Theta| S &= \frac{N}{2v} \\
\frac{1}{S} |\Theta| S &= \frac{N}{2v} \frac{1}{S} \\
|\Theta| &= \frac{N}{2v S}.
\end{aligned}$$

Finally, once  $|\Theta|$  is an integer greater or equal to 2, it holds that:

$$oe \geq |\Theta| = \lceil |\Theta| \rceil = \left\lceil \frac{N}{2v S} \right\rceil.$$

□

## 1.2 Lower-bound time for DNA replication with constitutive origins only

We start with formal definitions of chromosome and also of constitutive origins. A *chromosome*  $\langle 1, N \rangle$  is an ordered set of the first  $N$  positive integers. A *constitutive origin*  $\theta$  is a positive integer in  $\langle 1, N \rangle$ . The correctness of Equation 4 is assured by the following theorem.

**Theorem S2.** *Let  $v$  be the replication fork average speed. For a given chromosome of size  $N$ , let  $\Theta = \{\theta_1, \dots, \theta_{|\Theta|}\}$  be a set of constitutive origins,  $\theta_1 < \dots < \theta_{|\Theta|}$ . The lower-bound time for complete chromosome replication with origins in  $\Theta$  only is:*

$$T(\Theta, \langle 1, N \rangle) \geq \max_{1 \leq i \leq |\Theta|+1} \left\{ \frac{1}{2v} (\theta_i - \theta_{i-1}) \right\}, \quad (4)$$

where  $\theta_0 = -\theta_1$  and  $\theta_{|\Theta|+1} = 2N - \theta_{|\Theta|}$ .

*Proof.* This proof is an induction on  $|\Theta|$ . If  $|\Theta| = 1$ , then the firing of the single origin yields

two forks. One of them slides, at velocity  $v$ , from location  $\theta_1$  to 1; the other one slides, also at velocity  $v$ , from  $\theta_1$  to  $N$ . Thus, we have:

$$\begin{aligned}
T(\Theta, \langle 1, N \rangle) &\geq T(\{\theta_1\}, \langle 1, N \rangle) \\
&\geq \max \left\{ \frac{\theta_1}{v}, \frac{N - \theta_1}{v} \right\} \\
&\geq \max \left\{ \frac{2\theta_1}{2v}, \frac{2(N - \theta_1)}{2v} \right\} \\
&\geq \max \left\{ \frac{\theta_1 + \theta_1}{2v}, \frac{2N - 2\theta_1}{2v} \right\} \\
&\geq \max \left\{ \frac{\theta_1 - (-\theta_1)}{2v}, \frac{(2N - \theta_1) - \theta_1}{2v} \right\} \\
&\geq \max \left\{ \frac{\theta_1 - \theta_0}{2v}, \frac{\theta_{|\Theta|+1} - \theta_{|\Theta|}}{2v} \right\} \\
&\geq \max_{1 \leq i \leq |\Theta|+1} \left\{ \frac{1}{2v} (\theta_i - \theta_{i-1}) \right\}.
\end{aligned}$$

Now, consider  $|\Theta| > 1$ . Let us set  $\Omega = \{\theta_{|\Theta|}\}$  and  $A = \Theta - \Omega$ . Moreover, we define  $N_A = \frac{\theta_{|\Theta|} - \theta_{|\Theta|-1}}{2}$  and  $N_\Omega = N - N_A$ . This is equivalent to split the original instance into two pieces: one contains the last origin ( $\theta_{|\Theta|}$ ) and the final stretch of the chromosome, which goes from halfway between  $\theta_{|\Theta|-1}$  and  $\theta_{|\Theta|}$  (that is, where the encounter of replisomes from these two origins takes place) and  $N$ ; and the second one with both the remaining origins ( $\theta_1, \dots, \theta_{|\Theta|-1}$ ) and the first stretch of the chromosome. Thus, we have:

$$\begin{aligned}
T(\Theta, \langle 1, N \rangle) &\geq T(\{\theta_1, \dots, \theta_{|\Theta|}\}, \langle 1, N \rangle) \\
&\geq \max \left\{ T(A, \langle 1, N_A \rangle), T(\Omega, \langle 1, N_\Omega \rangle) \right\} \\
&\geq \max \left\{ \max \left\{ \frac{\alpha_1}{v}, \dots, \frac{N_A - \alpha_{|A|}}{v} \right\}, \max \left\{ \frac{\omega_1}{v}, \frac{N_\Omega - \omega_{|\Omega|}}{v} \right\} \right\} \\
&\geq \max \left\{ \underbrace{\max_{1 \leq i \leq |A|+1} \left\{ \frac{1}{2v} (\alpha_i - \alpha_{i-1}) \right\}}_{\text{induction hypothesis}}, \underbrace{\max_{1 \leq i \leq |\Omega|+1} \left\{ \frac{1}{2v} (\omega_i - \omega_{i-1}) \right\}}_{\text{as in the case of } |\Theta| = 1} \right\} \\
&\geq \max \left\{ \max_{1 \leq i \leq (|\Theta|-1)+1} \left\{ \frac{1}{2v} (\theta_i - \theta_{i-1}) \right\}, \max_{1 \leq i \leq (1)+1} \left\{ \frac{1}{2v} (\theta_{|\Theta|+i-1} - \theta_{|\Theta|+i-2}) \right\} \right\} \\
&\geq \max \left\{ \max_{1 \leq i \leq |\Theta|} \left\{ \frac{1}{2v} (\theta_i - \theta_{i-1}) \right\}, \max_{|\Theta| \leq i \leq |\Theta|+1} \left\{ \frac{1}{2v} (\theta_i - \theta_{i-1}) \right\} \right\} \\
&\geq \max \left\{ \max_{1 \leq i \leq |\Theta|+1} \left\{ \frac{1}{2v} (\theta_i - \theta_{i-1}) \right\} \right\} \\
&\geq \max_{1 \leq i \leq |\Theta|+1} \left\{ \frac{1}{2v} (\theta_i - \theta_{i-1}) \right\}.
\end{aligned}$$

□

## 2 Supplementary Figures

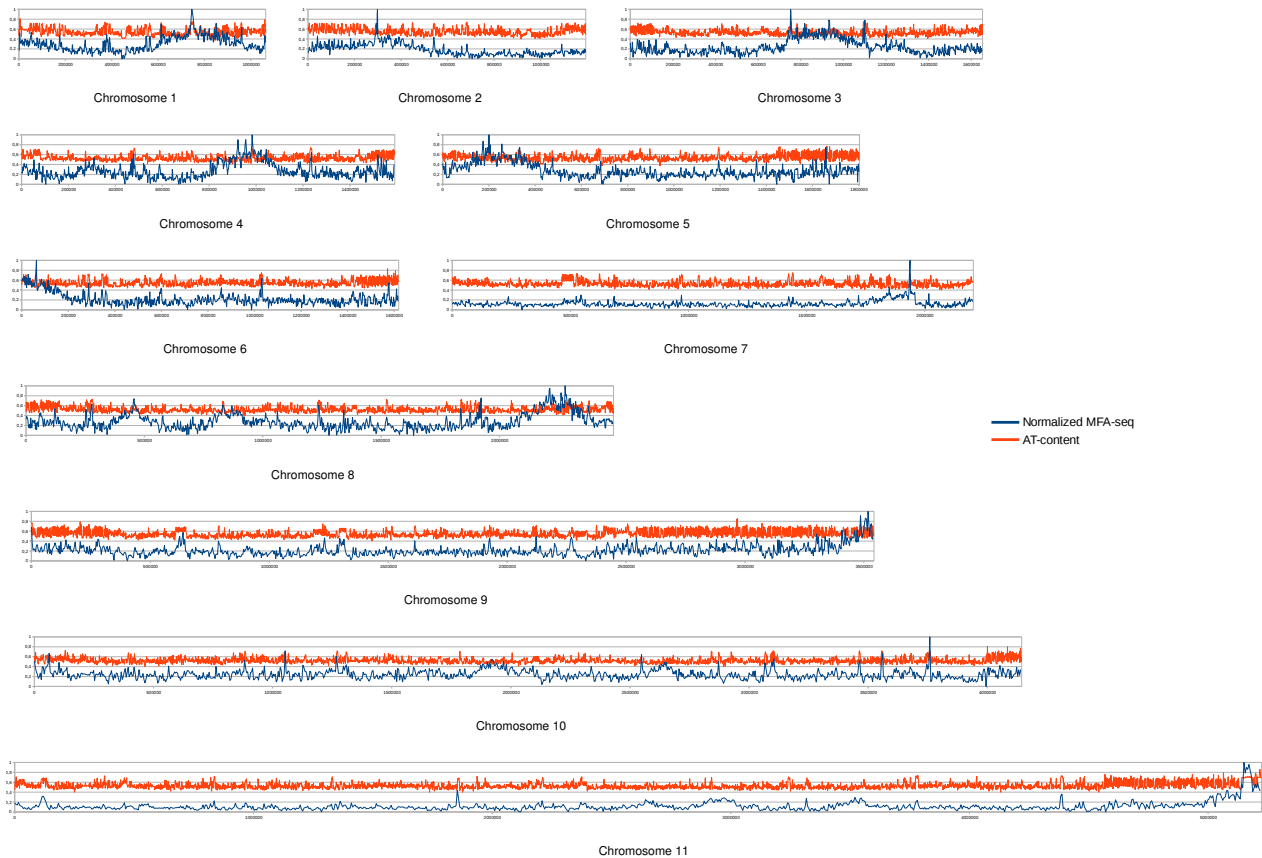

**Figure S1. Probability landscapes for origin firing of the core-genome of *T. brucei* TREU927.** For each chromosome, MFA-seq data downloaded from TriTrypDB database were normalized through a linear transformation (blue lines). The obtained patterns are then compared with AT-content distribution of their respective chromosomes (red lines).

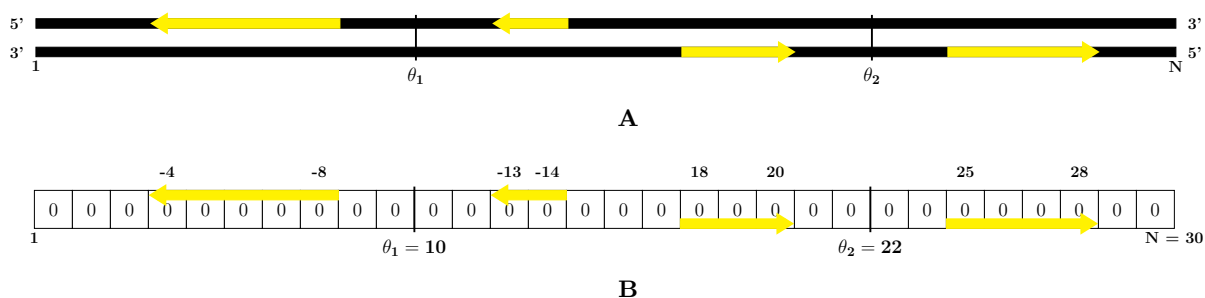

**Figure S2. Chromosome representation in our dynamic model. A.** Example of chromosome description, which includes its size  $N$ , locations of constitutive origins (in this example we have two of them,  $\theta_1$  and  $\theta_2$ ) and location of polycistronic regions in both strands (yellow arrows). **B.** Example of chromosome description mapping into a binary vector, where "0" and "1" means that a given nucleotide is non-replicated and replicated, respectively. In this example, we assume  $N = 30$  nucleotides. Additional data are stored to give coordinates of constitutive origins and polycistronic regions; in the case of this latter, negative values mean that it is located in the complementary strand in respect to the initial nucleotide.

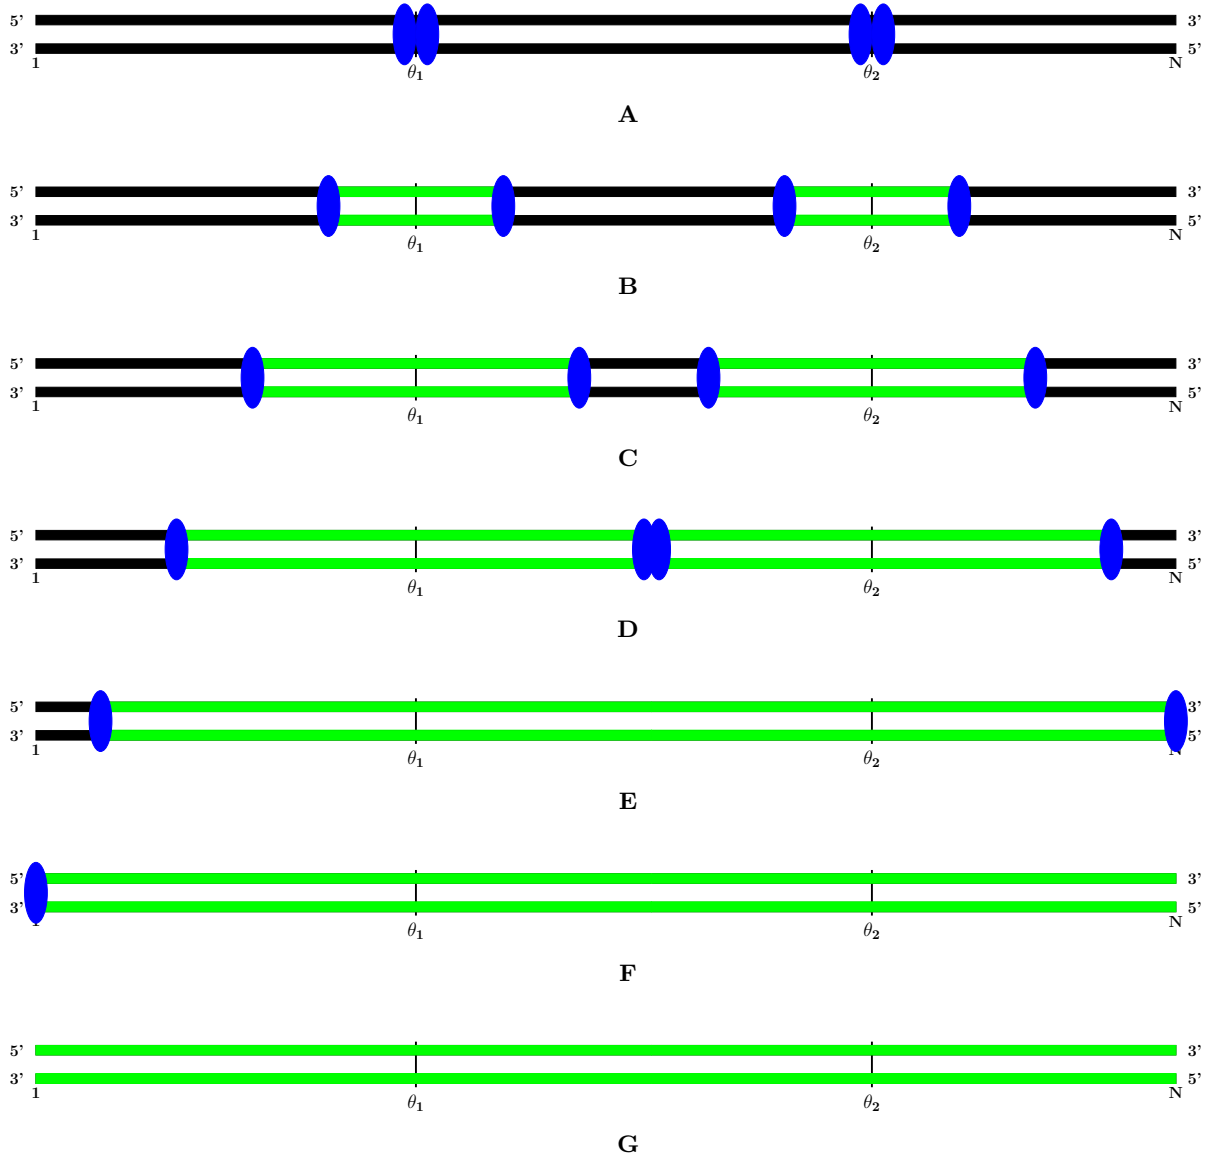

**Figure S3. Example of DNA replication dynamics.** **A.** Two origins ( $\theta_1$  and  $\theta_2$ ) are fired, with two replisomes (blue ellipses) binding on each origin. **B–C.** For each fired origin, its respective pair of replisomes slide on the opposite direction to each other, leaving behind replicated chromosome (in green). **D–E.** If there is a head-to-head collision between two replisomes, they unbind the chromosome. **F–G.** The replisome also unbinds the chromosome if it reaches an extremity of the chromosome.

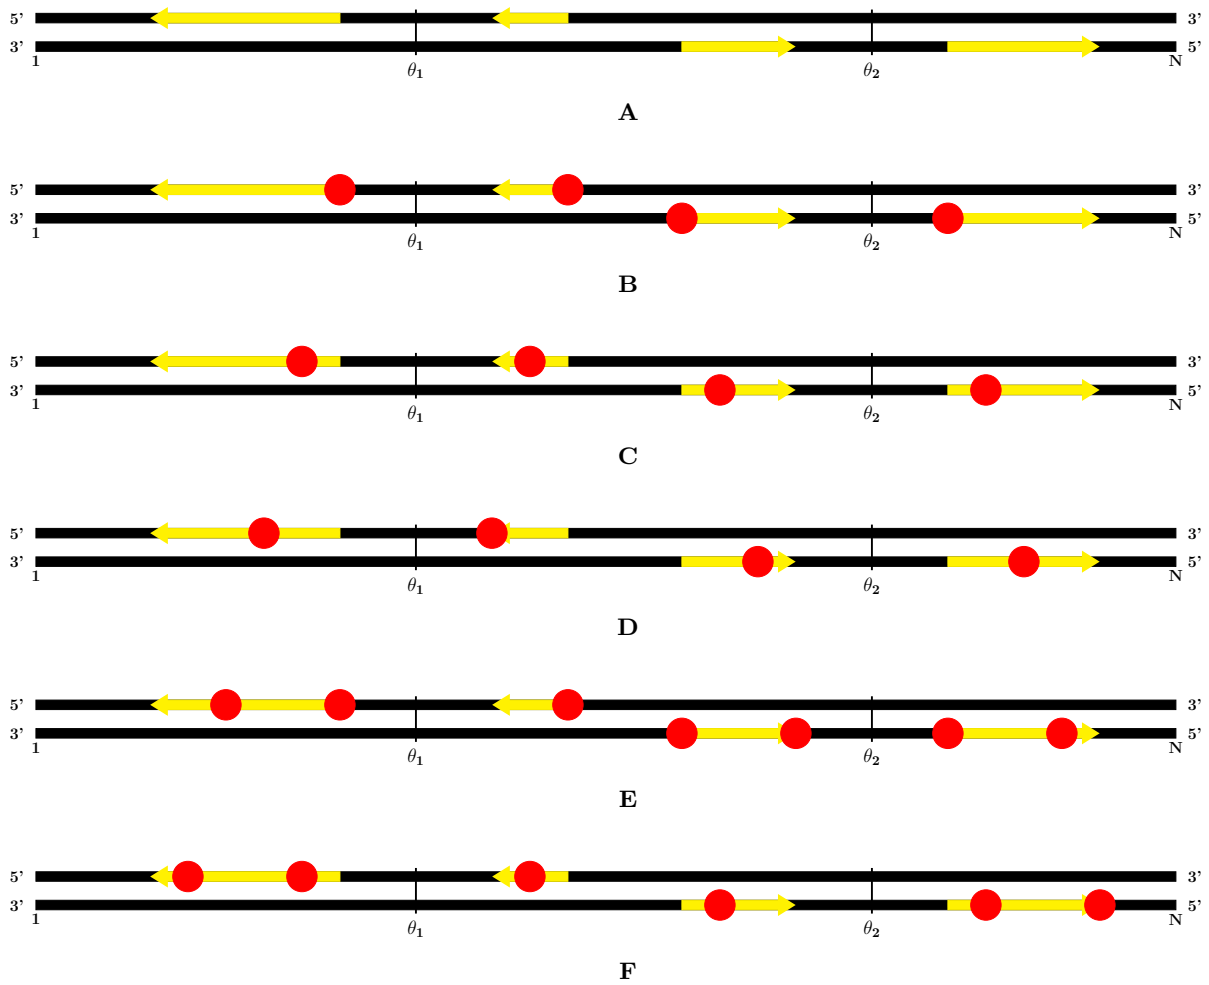

**Figure S4. Example of DNA transcription dynamics.** **A–B.** At a given constant frequency, a RNA polymerase (RNAP) binds to the beginning of each polycistronic region. At each iteration, all RNAPs slides on the chromosome at a constant velocity (**B–F**). When a RNAP reaches the end of polycistronic region, it releases the chromosome (e.g., compare **E** with **F**, looking at the second rightmost yellow arrow).



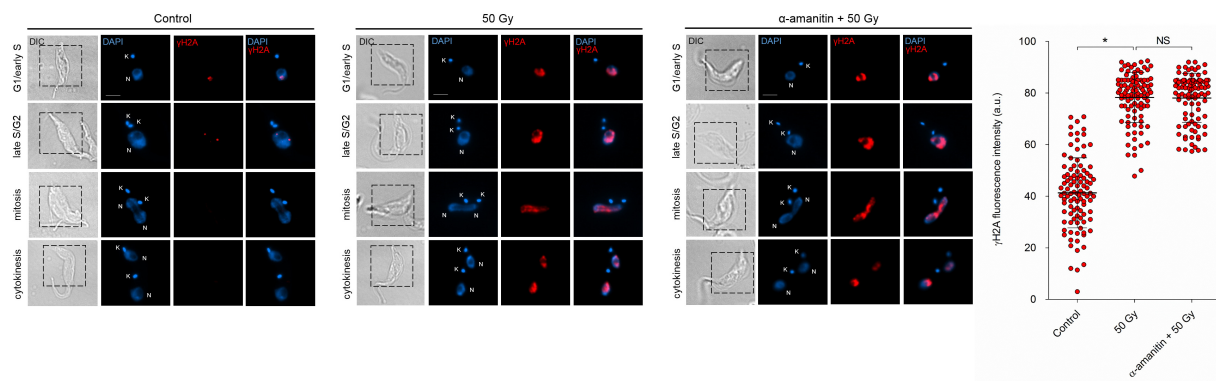

**Figure S5. The immediate phosphorylation of H2A does not depend directly on nascent RNAs inhibited by  $\alpha$ -amanitin.** Distribution profile of  $\gamma$ H2A fluorescence throughout the cell cycle of non-treated (control), ionizing radiation (50 Gy) treated, and treated with  $\alpha$ -amanitin + 50 Gy parasites. The scale bar on the fluorescence images corresponds to  $2 \mu\text{m}$ . K and N mean kinetoplast and nucleus, respectively. The graph shows the  $\gamma$ H2A fluorescence intensity (red) per cell in the samples previously described. Errors bars indicate SD. \* and NS mean, respectively,  $p < 0.001$  and non-significant using Student's t-test ( $n = 100$  cells per group).

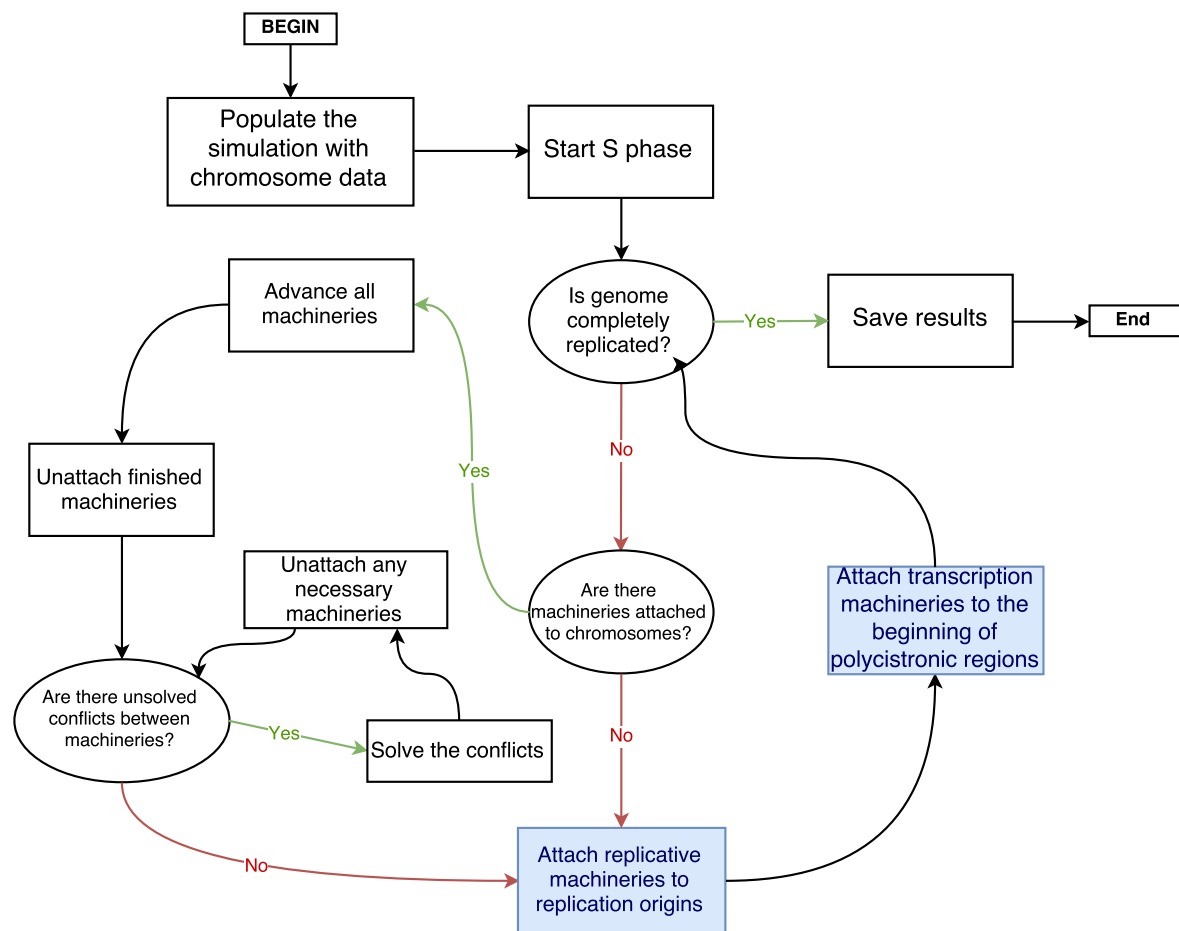

**Figure S6. Fluxogram of the DNA replication simulator.** In this chart, it is depicted the major steps during a simulation of DNA replication dynamics in *T. brucei* TREU927. The simulator implementation, called ReDyMo, was coded in Python programming language and is available at GitHub: [github.com/msreis/ReDyMo](https://github.com/msreis/ReDyMo). A C++ port of this program is also available at that repository: [github.com/msreis/ReDyMo-CPP](https://github.com/msreis/ReDyMo-CPP).

### 3 Supplementary Tables

**Table S1.** Lower-bound time for DNA replication in *T. brucei* TREU927 megabase-sized chromosomes, using only putative constitutive origins presented in Tiengwe et al. (2012). These results were obtained using the Equation 4 of the current study. In the case where artificial origins were included in subtelomeric regions, for a chromosome of size  $N$ , a pair of origins were included into positions 50 kb and  $(N - 50$  kb).

| Chromosome number | Replisome velocity (b/sec) | Including putative origin in subtelomeric regions? | Time (sec) |
|-------------------|----------------------------|----------------------------------------------------|------------|
| 1                 | 61.66                      | Yes                                                | 5163.36    |
| 2                 | 61.66                      | Yes                                                | 5080.33    |
| 3                 | 61.66                      | Yes                                                | 6726.55    |
| 4                 | 61.66                      | Yes                                                | 5080.33    |
| 5                 | 61.66                      | Yes                                                | 5226.88    |
| 6                 | 61.66                      | Yes                                                | 9950.6     |
| 7                 | 61.66                      | Yes                                                | 14068.6    |
| 8                 | 61.66                      | Yes                                                | 3566       |
| 9                 | 61.66                      | Yes                                                | 10200.66   |
| 10                | 61.66                      | Yes                                                | 11805.23   |
| 11                | 61.66                      | Yes                                                | 13861.97   |
|                   |                            |                                                    |            |
| 1                 | 30.66                      | Yes                                                | 10383.99   |
| 2                 | 30.66                      | Yes                                                | 10216.99   |
| 3                 | 30.66                      | Yes                                                | 13527.69   |
| 4                 | 30.66                      | Yes                                                | 10216.99   |
| 5                 | 30.66                      | Yes                                                | 10511.73   |
| 6                 | 30.66                      | Yes                                                | 20011.55   |
| 7                 | 30.66                      | Yes                                                | 28293.22   |
| 8                 | 30.66                      | Yes                                                | 7171.54    |
| 9                 | 30.66                      | Yes                                                | 20514.45   |
| 10                | 30.66                      | Yes                                                | 23741.37   |
| 11                | 30.66                      | Yes                                                | 27877.66   |
|                   |                            |                                                    |            |
| 1                 | 61.66                      | No                                                 | 11137.63   |
| 2                 | 61.66                      | No                                                 | 5080.33    |
| 3                 | 61.66                      | No                                                 | 14264      |
| 4                 | 61.66                      | No                                                 | 5178.02    |
| 5                 | 61.66                      | No                                                 | 7638.31    |
| 6                 | 61.66                      | No                                                 | 10160.66   |
| 7                 | 61.66                      | No                                                 | 14068.6    |
| 8                 | 61.66                      | No                                                 | 7620.48    |
| 9                 | 61.66                      | No                                                 | 21212.23   |
| 10                | 61.66                      | No                                                 | 24421.36   |
| 11                | 61.66                      | No                                                 | 28534.84   |
|                   |                            |                                                    |            |
| 1                 | 30.66                      | No                                                 | 22398.76   |
| 2                 | 30.66                      | No                                                 | 10216.99   |
| 3                 | 30.66                      | No                                                 | 28686.17   |
| 4                 | 30.66                      | No                                                 | 10413.47   |
| 5                 | 30.66                      | No                                                 | 15361.32   |
| 6                 | 30.66                      | No                                                 | 20433.99   |
| 7                 | 30.66                      | No                                                 | 28293.22   |
| 8                 | 30.66                      | No                                                 | 15325.47   |
| 9                 | 30.66                      | No                                                 | 42659.69   |
| 10                | 30.66                      | No                                                 | 49113.54   |
| 11                | 30.66                      | No                                                 | 57386.11   |

**Table S2.** Results with the DNA replication model. For each number of available replisomes during simulation ( $F$ ) and for each transcription period, it was carried out 30 simulations, whose results were averaged. To evaluate S-phase duration robustness in increasing levels of transcription, for each  $F$  value, the assay with no transcription was assumed as taking exactly the measured S-phase duration (2.31 hours); thus, the S-phase duration of the remaining assays of this  $F$  value were obtained through a normalization using the mean number of iterations. A similar procedure was used to yield the transcription frequency of each assay. AU = arbitrary unit; IOD = inter-origin distance. We highlight in yellow the S-phase duration that is within the interval [2.07, 2.55] (10% above or below the measured S-phase duration). We also highlight in green a replisome velocity ( $v$ ) that is within either the interval [55.49, 67.82] or the interval [27.59, 33.72] (i.e., 10% above or below the two different measured values for  $v$ ).

| F  | Transcription period (# iterations) | Mean # iterations (AU) | Dev # iterations (AU) | Mean IOD (b) | Dev IOD (b) | Median distance between origin and fork stall (b) | Mean distance between origin and fork stall (b) | Dev distance between origin and fork stall (b) | S-phase duration (hours) | Transcription frequency (mHz) | v (b/sec, assuming 1 replicated base per iteration and S-phase duration = 2.31 h) |
|----|-------------------------------------|------------------------|-----------------------|--------------|-------------|---------------------------------------------------|-------------------------------------------------|------------------------------------------------|--------------------------|-------------------------------|-----------------------------------------------------------------------------------|
| 10 | $\infty$                            | 2800095.1              | 30888.4               | 507657.7     | 53802.0     |                                                   |                                                 |                                                | 2.3                      | 0.0                           | 336.7                                                                             |
| 10 | 100000                              | 2817172.0              | 17064.3               | 213484.2     | 18205.9     | 45233.0                                           | 129795.9                                        | 187904.0                                       | 2.3                      | 3.4                           | 338.8                                                                             |
| 10 | 10000                               | 2860804.2              | 58556.9               | 141292.4     | 11247.3     | 4620.0                                            | 72553.5                                         | 140539.4                                       | 2.4                      | 33.7                          | 344.0                                                                             |
| 10 | 1000                                | 3260555.7              | 1497059.0             | 121283.6     | 10205.9     | 464.0                                             | 61239.6                                         | 127105.8                                       | 2.7                      | 336.7                         | 392.1                                                                             |
| 10 | 100                                 | 6434736.4              | 7115102.6             | 110937.4     | 9661.3      | 47.0                                              | 57567.4                                         | 125154.0                                       | 5.3                      | 3367.1                        | 773.8                                                                             |
| 15 | $\infty$                            | 1839820.9              | 12613.1               | 368282.7     | 34977.4     |                                                   |                                                 |                                                | 2.3                      | 0.0                           | 221.2                                                                             |
| 15 | 100000                              | 1843163.4              | 7578.8                | 182898.3     | 13283.7     | 40746.0                                           | 108899.1                                        | 155570.0                                       | 2.3                      | 2.2                           | 221.6                                                                             |
| 15 | 10000                               | 1866277.9              | 37641.8               | 125713.7     | 10171.4     | 4356.0                                            | 59993.8                                         | 118054.2                                       | 2.3                      | 22.1                          | 224.4                                                                             |
| 15 | 1000                                | 2189960.7              | 1565243.4             | 108444.9     | 8290.3      | 438.0                                             | 50760.7                                         | 109193.9                                       | 2.7                      | 221.2                         | 263.3                                                                             |
| 15 | 100                                 | 4740660.0              | 5990392.1             | 98182.3      | 7598.6      | 44.0                                              | 46032.9                                         | 101346.1                                       | 6.0                      | 2212.4                        | 570.1                                                                             |
| 20 | $\infty$                            | 1366731.4              | 7473.2                | 286127.3     | 23474.3     |                                                   |                                                 |                                                | 2.3                      | 0.0                           | 164.3                                                                             |
| 20 | 100000                              | 1372061.9              | 17356.8               | 159169.6     | 11235.3     | 37424.0                                           | 90306.8                                         | 126946.1                                       | 2.3                      | 1.6                           | 165.0                                                                             |
| 20 | 10000                               | 1389404.7              | 42302.8               | 111555.1     | 7676.9      | 4136.0                                            | 50544.6                                         | 101466.4                                       | 2.3                      | 16.4                          | 167.1                                                                             |
| 20 | 1000                                | 1641386.5              | 1274142.6             | 97189.2      | 6978.8      | 418.0                                             | 41770.5                                         | 91026.6                                        | 2.8                      | 164.3                         | 197.4                                                                             |
| 20 | 100                                 | 3205539.8              | 4044632.7             | 89712.3      | 7281.5      | 42.0                                              | 39025.0                                         | 88064.3                                        | 5.4                      | 1643.5                        | 385.5                                                                             |
| 25 | $\infty$                            | 1090247.8              | 4573.0                | 239136.1     | 17685.7     |                                                   |                                                 |                                                | 2.3                      | 0.0                           | 131.1                                                                             |
| 25 | 100000                              | 1092353.0              | 11973.9               | 142005.4     | 9915.8      | 35337.0                                           | 80573.2                                         | 112239.2                                       | 2.3                      | 1.3                           | 131.4                                                                             |
| 25 | 10000                               | 1107750.5              | 61041.8               | 101390.8     | 7316.2      | 3967.0                                            | 42407.8                                         | 85779.7                                        | 2.3                      | 13.1                          | 133.2                                                                             |
| 25 | 1000                                | 1228004.8              | 358337.7              | 88298.6      | 6069.0      | 401.0                                             | 35271.1                                         | 79070.5                                        | 2.6                      | 131.1                         | 147.7                                                                             |
| 25 | 100                                 | 3332021.0              | 5142399.5             | 82623.7      | 5673.9      | 41.0                                              | 33935.2                                         | 77664.4                                        | 7.1                      | 1311.0                        | 400.7                                                                             |
| 30 | $\infty$                            | 905337.8               | 3478.9                | 205601.7     | 17169.5     |                                                   |                                                 |                                                | 2.3                      | 0.0                           | 108.9                                                                             |
| 30 | 100000                              | 913140.2               | 76405.2               | 129295.6     | 7831.6      | 33995.5                                           | 72276.9                                         | 99672.0                                        | 2.3                      | 1.1                           | 109.8                                                                             |
| 30 | 10000                               | 921835.3               | 107740.3              | 92996.2      | 5906.1      | 3799.0                                            | 36945.2                                         | 75958.3                                        | 2.4                      | 10.9                          | 110.9                                                                             |
| 30 | 1000                                | 1046636.5              | 730012.3              | 82149.5      | 5678.5      | 390.0                                             | 31163.0                                         | 70923.4                                        | 2.7                      | 108.9                         | 125.9                                                                             |
| 30 | 100                                 | 2600757.7              | 3182643.0             | 76181.5      | 5010.4      | 40.0                                              | 29446.1                                         | 68710.2                                        | 6.6                      | 1088.7                        | 312.7                                                                             |
| 35 | $\infty$                            | 775349.0               | 2635.3                | 178763.3     | 12876.4     |                                                   |                                                 |                                                | 2.3                      | 0.0                           | 93.2                                                                              |
| 35 | 100000                              | 776810.4               | 4215.0                | 116340.1     | 6907.0      | 30750.0                                           | 62210.4                                         | 85360.9                                        | 2.3                      | 0.9                           | 93.4                                                                              |
| 35 | 10000                               | 783515.9               | 26817.3               | 86024.9      | 5522.3      | 3709.0                                            | 33027.3                                         | 69313.3                                        | 2.3                      | 9.3                           | 94.2                                                                              |
| 35 | 1000                                | 901612.9               | 342192.1              | 75969.4      | 4830.5      | 379.0                                             | 27320.6                                         | 63657.3                                        | 2.7                      | 93.2                          | 108.4                                                                             |
| 35 | 100                                 | 2072921.1              | 2912049.2             | 70961.9      | 4938.3      | 39.0                                              | 25989.1                                         | 61507.7                                        | 6.2                      | 932.4                         | 249.3                                                                             |
| 40 | $\infty$                            | 677625.5               | 2137.2                | 157214.2     | 9961.0      |                                                   |                                                 |                                                | 2.3                      | 0.0                           | 81.5                                                                              |
| 40 | 100000                              | 678935.1               | 3014.4                | 106850.2     | 6210.1      | 29260.0                                           | 57192.6                                         | 76962.6                                        | 2.3                      | 0.8                           | 81.6                                                                              |
| 40 | 10000                               | 686226.7               | 25534.2               | 79396.1      | 4780.5      | 3558.0                                            | 28807.8                                         | 60704.9                                        | 2.3                      | 8.1                           | 82.5                                                                              |
| 40 | 1000                                | 811819.7               | 375015.4              | 70829.3      | 4164.1      | 372.0                                             | 24008.1                                         | 57015.7                                        | 2.8                      | 81.5                          | 97.6                                                                              |
| 40 | 100                                 | 2118548.1              | 4059633.2             | 66048.7      | 4377.3      | 38.0                                              | 22850.7                                         | 55247.6                                        | 7.2                      | 814.8                         | 254.8                                                                             |
| 45 | $\infty$                            | 602177.4               | 1837.9                | 142335.6     | 8838.5      |                                                   |                                                 |                                                | 2.3                      | 0.0                           | 72.4                                                                              |
| 45 | 100000                              | 603072.6               | 3099.8                | 100210.0     | 5311.3      | 28598.5                                           | 53302.7                                         | 69710.4                                        | 2.3                      | 0.7                           | 72.5                                                                              |
| 45 | 10000                               | 610230.4               | 30743.2               | 74854.0      | 4325.1      | 3498.0                                            | 25849.5                                         | 55566.0                                        | 2.3                      | 7.2                           | 73.4                                                                              |
| 45 | 1000                                | 708700.2               | 383742.3              | 66178.0      | 3954.6      | 362.0                                             | 21093.7                                         | 51515.5                                        | 2.7                      | 72.4                          | 85.2                                                                              |
| 45 | 100                                 | 1774159.7              | 2592117.8             | 62080.9      | 3786.4      | 37.0                                              | 20228.0                                         | 50085.0                                        | 6.8                      | 724.1                         | 213.3                                                                             |
| 50 | $\infty$                            | 541492.5               | 1574.1                | 129126.6     | 7984.0      |                                                   |                                                 |                                                | 2.3                      | 0.0                           | 65.1                                                                              |
| 50 | 100000                              | 543291.4               | 6738.4                | 92334.5      | 4781.4      | 26165.0                                           | 47789.3                                         | 62848.3                                        | 2.3                      | 0.7                           | 65.3                                                                              |
| 50 | 10000                               | 550079.7               | 45092.1               | 70253.9      | 3948.1      | 3408.0                                            | 23551.7                                         | 50220.6                                        | 2.3                      | 6.5                           | 66.1                                                                              |
| 50 | 1000                                | 628461.0               | 230268.9              | 62115.1      | 3519.6      | 355.0                                             | 18942.1                                         | 46911.2                                        | 2.7                      | 65.1                          | 75.6                                                                              |
| 50 | 100                                 | 1591908.7              | 2144777.9             | 58432.2      | 3310.1      | 36.0                                              | 18320.1                                         | 46296.7                                        | 6.8                      | 651.1                         | 191.4                                                                             |

(Continuation of Table S2.)

|     |        |           |           |          |        |         |         |         |  |     |       |       |
|-----|--------|-----------|-----------|----------|--------|---------|---------|---------|--|-----|-------|-------|
| 55  | ∞      | 492248.0  | 1357.9    | 118074.5 | 7226.6 |         |         |         |  | 2.3 | 0.0   | 59.2  |
| 55  | 100000 | 493378.3  | 4812.7    | 86915.3  | 4676.7 | 26484.0 | 45990.3 | 58052.1 |  | 2.3 | 0.6   | 59.3  |
| 55  | 10000  | 506864.4  | 158713.5  | 66324.9  | 4160.5 | 3330.0  | 21430.5 | 46213.5 |  | 2.4 | 5.9   | 61.0  |
| 55  | 1000   | 602750.6  | 522172.0  | 58600.7  | 3401.2 | 348.0   | 16803.2 | 42456.6 |  | 2.8 | 59.2  | 72.5  |
| 55  | 100    | 1517570.9 | 2608599.9 | 55600.7  | 2934.0 | 36.0    | 16410.2 | 42150.7 |  | 7.1 | 591.9 | 182.5 |
| 60  | ∞      | 451209.0  | 1287.7    | 109379.1 | 5943.1 |         |         |         |  | 2.3 | 0.0   | 54.3  |
| 60  | 100000 | 452063.1  | 1459.0    | 81340.2  | 4088.5 | 24341.0 | 41737.5 | 53059.9 |  | 2.3 | 0.5   | 54.4  |
| 60  | 10000  | 459041.8  | 40672.7   | 62862.0  | 3256.0 | 3261.0  | 19611.7 | 42967.4 |  | 2.4 | 5.4   | 55.2  |
| 60  | 1000   | 562847.8  | 396259.4  | 55971.7  | 3184.0 | 341.0   | 15700.9 | 40274.2 |  | 2.9 | 54.3  | 67.7  |
| 60  | 100    | 1196486.0 | 1557738.1 | 52805.7  | 2798.9 | 35.0    | 15176.6 | 39506.2 |  | 6.1 | 542.6 | 143.9 |
| 65  | ∞      | 416690.5  | 1059.0    | 102317.2 | 5184.4 |         |         |         |  | 2.3 | 0.0   | 50.1  |
| 65  | 100000 | 419022.9  | 22222.8   | 76655.0  | 3848.6 | 23868.0 | 39876.6 | 49548.8 |  | 2.3 | 0.5   | 50.4  |
| 65  | 10000  | 419777.9  | 9012.9    | 59448.8  | 3141.7 | 3212.0  | 18275.4 | 39784.3 |  | 2.3 | 5.0   | 50.5  |
| 65  | 1000   | 525695.8  | 369050.6  | 53309.7  | 2600.0 | 338.0   | 14306.9 | 37171.1 |  | 2.9 | 50.1  | 63.2  |
| 65  | 100    | 1018359.3 | 1160598.6 | 50208.6  | 2870.1 | 35.0    | 13627.4 | 36149.3 |  | 5.6 | 501.1 | 122.5 |
| 70  | ∞      | 386820.1  | 1095.7    | 95758.1  | 4472.7 |         |         |         |  | 2.3 | 0.0   | 46.5  |
| 70  | 100000 | 387294.1  | 1624.5    | 73345.5  | 3417.7 | 23965.0 | 38336.1 | 46188.7 |  | 2.3 | 0.5   | 46.6  |
| 70  | 10000  | 390106.8  | 5895.2    | 56481.7  | 2770.3 | 3169.0  | 16760.1 | 36816.9 |  | 2.3 | 4.7   | 46.9  |
| 70  | 1000   | 427303.8  | 89961.1   | 50720.7  | 2775.3 | 333.0   | 12945.2 | 34516.0 |  | 2.6 | 46.5  | 51.4  |
| 70  | 100    | 1206053.1 | 1552662.8 | 47965.1  | 2479.4 | 34.0    | 12667.1 | 34083.8 |  | 7.2 | 465.2 | 145.0 |
| 75  | ∞      | 361131.6  | 973.9     | 89976.4  | 4888.0 |         |         |         |  | 2.3 | 0.0   | 43.4  |
| 75  | 100000 | 361833.5  | 1803.3    | 69329.7  | 3171.4 | 22021.0 | 35182.0 | 42541.5 |  | 2.3 | 0.4   | 43.5  |
| 75  | 10000  | 367518.3  | 25946.0   | 54162.5  | 2615.8 | 3109.0  | 15684.6 | 34894.5 |  | 2.4 | 4.3   | 44.2  |
| 75  | 1000   | 441436.6  | 383113.9  | 48477.1  | 2373.4 | 329.0   | 12118.0 | 32506.3 |  | 2.8 | 43.4  | 53.1  |
| 75  | 100    | 1045756.9 | 1379431.5 | 45859.1  | 2277.6 | 34.0    | 11751.4 | 32170.5 |  | 6.7 | 434.3 | 125.8 |
| 80  | ∞      | 338524.0  | 924.4     | 84812.5  | 4027.7 |         |         |         |  | 2.3 | 0.0   | 40.7  |
| 80  | 100000 | 339262.9  | 1117.0    | 65948.4  | 2975.9 | 21418.5 | 33986.3 | 40504.9 |  | 2.3 | 0.4   | 40.8  |
| 80  | 10000  | 344841.5  | 35100.9   | 51539.6  | 2326.0 | 3070.0  | 14686.0 | 32735.9 |  | 2.4 | 4.1   | 41.5  |
| 80  | 1000   | 400331.0  | 175977.9  | 46513.5  | 2154.9 | 326.0   | 11130.4 | 30325.1 |  | 2.7 | 40.7  | 48.1  |
| 80  | 100    | 1105893.4 | 2205852.8 | 44178.2  | 2141.4 | 34.0    | 10723.7 | 29898.6 |  | 7.5 | 407.1 | 133.0 |
| 85  | ∞      | 318767.5  | 867.4     | 80274.4  | 3999.7 |         |         |         |  | 2.3 | 0.0   | 38.3  |
| 85  | 100000 | 319419.2  | 1202.3    | 63237.8  | 2696.7 | 21246.0 | 32516.3 | 37670.2 |  | 2.3 | 0.4   | 38.4  |
| 85  | 10000  | 325643.2  | 38887.5   | 49549.9  | 2347.1 | 3012.0  | 13561.6 | 30105.8 |  | 2.4 | 3.8   | 39.2  |
| 85  | 1000   | 379827.1  | 242833.6  | 44792.9  | 2059.7 | 322.0   | 10426.0 | 28925.9 |  | 2.8 | 38.3  | 45.7  |
| 85  | 100    | 972180.0  | 1934585.7 | 42365.1  | 2177.0 | 33.0    | 10032.5 | 28322.3 |  | 7.0 | 383.3 | 116.9 |
| 90  | ∞      | 301024.7  | 795.0     | 76673.3  | 4033.8 |         |         |         |  | 2.3 | 0.0   | 36.2  |
| 90  | 100000 | 301498.9  | 1797.8    | 61112.4  | 2944.7 | 21181.5 | 31987.4 | 35991.0 |  | 2.3 | 0.4   | 36.3  |
| 90  | 10000  | 309192.1  | 86882.2   | 47727.9  | 2133.8 | 2996.0  | 12966.7 | 29054.6 |  | 2.4 | 3.6   | 37.2  |
| 90  | 1000   | 380087.2  | 330827.9  | 42883.8  | 2032.9 | 320.0   | 9478.2  | 26584.1 |  | 2.9 | 36.2  | 45.7  |
| 90  | 100    | 941594.0  | 1290239.6 | 40785.9  | 1895.1 | 33.0    | 9254.2  | 26647.2 |  | 7.2 | 362.0 | 113.2 |
| 95  | ∞      | 285325.5  | 807.1     | 72379.1  | 3308.8 |         |         |         |  | 2.3 | 0.0   | 34.3  |
| 95  | 100000 | 285815.4  | 911.2     | 58132.2  | 2528.1 | 20459.0 | 30541.2 | 34299.6 |  | 2.3 | 0.3   | 34.4  |
| 95  | 10000  | 290402.8  | 29322.6   | 46101.1  | 2061.3 | 2965.0  | 12387.1 | 27529.5 |  | 2.4 | 3.4   | 34.9  |
| 95  | 1000   | 333917.2  | 143953.0  | 41443.8  | 1924.9 | 315.0   | 9081.5  | 25781.7 |  | 2.7 | 34.3  | 40.2  |
| 95  | 100    | 886119.5  | 1384115.0 | 39610.9  | 1855.4 | 33.0    | 8808.1  | 25632.4 |  | 7.2 | 343.1 | 106.6 |
| 100 | ∞      | 271169.7  | 838.2     | 69229.1  | 3265.1 |         |         |         |  | 2.3 | 0.0   | 32.6  |
| 100 | 100000 | 271578.4  | 855.7     | 55786.0  | 2131.6 | 19784.5 | 29263.5 | 32634.9 |  | 2.3 | 0.3   | 32.7  |
| 100 | 10000  | 275506.8  | 36723.0   | 44097.7  | 1839.6 | 2921.0  | 11586.8 | 25738.7 |  | 2.3 | 3.3   | 33.1  |
| 100 | 1000   | 319224.5  | 130987.8  | 40073.0  | 1737.7 | 314.0   | 8403.7  | 24306.4 |  | 2.7 | 32.6  | 38.4  |
| 100 | 100    | 812367.2  | 1046166.6 | 38202.2  | 1696.7 | 33.0    | 8281.0  | 24266.9 |  | 6.9 | 326.1 | 97.7  |
